# Supplementary material for: Statistical meta-analysis to investigate the association between the Interleukin-6 (IL-6) gene polymorphisms and cancer risk
Source: PLoS One. 2021 Mar 8;16(3):e0247055. doi: 10.1371/journal.pone.0247055 (PMC7939379; doi:10.1371/journal.pone.0247055)
Supplement: S2 Data — (XLSX) [file pone.0247055.s006.xlsx]

## Sheet: Sheet1
Author	Year	Country	Ethnicity	Analysis type	Case	Control	Cancer	Case			Control
								GG	GC	CC	GG	GC	CC
Zhang et al.	2017	China	Asian	Case-Control	473	474	Stomach Cancer	39	162	272	34	191	249
Haung et al.	2016	China	Asian	Case-Control	236	256	Prostate Cancer	31	88	117	23	89	144
Slattery et al.	2009	USA	Caucasian	Case-Control	750	1205	Colon Cancer	647	72	74	863	70	72
Su et al.	2010	China	Asian	Case-Control	363	370	Lung Cancer	193	156	14	233	117	20
Lim et al.	2011	Singapore	Asian	Case-Control	298	718	Lung Cancer	163	123	12	449	231	38
Bia et al.	2013	China	Asian	Case-Control	193	210	Lung Cancer	86	89	18	125	69	16
Chen et al.	2013	China	Asian	Case-Control	615	638	Lung Cancer	333	245	37	321	263	54
Liang et al.	2013	China	Asian	Case-Control	138	138	Lung Cancer	100	29	9	105	30	3
Kiyohara et al.	2014	Japan	Asian	Case-Control	462	379	Lung Cancer	259	175	28	250	116	13
Chen et al.	2015	China	Asian	Case-Control	212	236	Prostate Cancer	37	96	79	25	102	110
Cao et al.	2014	China	Asian	Case-Control	162	162	Stomach Cancer	72	62	28	87	59	16
Hwang (a) et al.	2003	USA	Caucasian	Case-Control	30	30	Stomach Cancer	11	16	3	18	7	5
Hwang (b) et al.	2003	USA	Asian	Case-Control	30	30	Stomach Cancer	16	13	1	16	13	1
Kang et al.	2009	Korea	Asian	Case-Control	332	326	Stomach Cancer	178	133	21	169	140	17
Xie et al.	2017	China	Asian	Case-Control	400	400	Stomach Cancer	187	165	48	211	160	29
Xing et al.	2006	China	Asian	Case-Control	65	71	Stomach Cancer	59	4	2	56	11	2
Tang et al.	2014	China	Asian	Case-Control	505	395	Other Cancers	310	173	22	267	118	10
Dos Santos et al.	2018	Brazil	Mixed	Case-Control	52	87	Stomach Cancer	40	10	2	64	22	1
Zhu et al.	2017	China	Asian	Case-Control	1514	1540	Other Cancers	94	522	898	78	499	963
Pierce et al.	2009	USA	Caucasian	Case-Control	175	1934	Prostate Cancer	156	19	0	1740	192	2
Wang et al.	2009	USA	Caucasian	Case-Control	253	280	Prostate Cancer	233	19	1	225	25	0
Tsilidis et al.	2009	USA	Caucasian	Case-Control	203	367	Colon Cancer	180	19	2	329	30	3
Bao et al.	2008	China	Asian	Case-Control	136	120	Prostate Cancer	47	39	50	28	27	65
Slattery et al.	2007	USA	Caucasian	Case-Control	1573	1972	Colon Cancer	631	696	246	728	897	347
Seow et al.	2006	Singapore	Asian	Case-Control	124	162	Lung Cancer	8	46	70	10	55	97
Kamanger et al.	2006	USA	Caucasian	Case-Control	102	152	Stomach Cancer	21	54	27	51	58	43
Sun et al.	2004	USA	Caucasian	Case-Control	1337	753	Prostate Cancer	1226	109	2	675	74	4
